Anesthesiology  
67:1017, 1987

## The Effect of Autotransfusion on Catecholamine Levels During Pheochromocytoma

*To The Editor:*—Smith *et al.*<sup>11</sup> reported abrupt hypertension with autologous blood transfusion in a patient during bilateral pheochromocytoma resection. They attributed the rise in blood pressure to high catecholamine levels in the transfused blood, but did not measure these concentrations. In order to confirm their proposed mechanism of hypertension, we measured catecholamine levels during the resection of a bilateral pheochromocytoma in a 63-yr-old man. In table 1, these levels are shown. We conclude from the very high epinephrine and norepinephrine concentrations in the packed red blood cells, that hypertension following infusion of this blood is not only possible, but likely.

MARK J. RICE, M.D.  
*Assistant Professor of Anesthesiology*

EDWARD V. VIOLANTE, M.D.  
*Resident in Anesthesiology*

JOHN F. KREUL, M.D.  
*Associate Professor of Anesthesiology*

*Department of Anesthesiology  
University of Wisconsin  
Madison, Wisconsin 53792*

TABLE 1. Catecholamine Concentrations

| Sample                          | Dopamine (ng/l) | Epinephrine (ng/l) | Norepinephrine (ng/l) |
|---------------------------------|-----------------|--------------------|-----------------------|
| Pre-induction (serum)           | 20              | 740                | 730                   |
| Right tumor resected (serum)    | 60              | 2500               | 1330                  |
| Left tumor manipulation (serum) | 50              | 16100              | 6700                  |
| Both tumors resected (serum)    | 50              | 430                | 790                   |
| Collection chamber              | *               | 1580000            | 240000                |
| First wash sample               | *               | 1670000            | 260000                |
| Second wash sample              | *               | 550000             | 82000                 |
| Packed red blood cells          | 50              | 27000              | 3800                  |

\* Unable to quantitate secondary to high norepinephrine interference.

## REFERENCE

1. Smith DF, Mihm FG, Mefford I: Hypertension after intraoperative autotransfusion in bilateral adrenalectomy for pheochromocytoma. *ANESTHESIOLOGY* 58:182-184, 1983

(Accepted for publication August 12, 1987.)

Anesthesiology  
67:1017-1018, 1987

## Another Aspect of Celiac Plexus Block

*To the Editor:*—Celiac plexus block is frequently used for relief of pain due to cancer of the pancreas.<sup>1,2</sup> Its use in alcoholic pancreatitis is less well described.<sup>3</sup> Due to anatomical variations of the celiac ganglia from T12 to L1 vertebra,<sup>4</sup> diagnostic block is important prior to neurolytic block.

Fluoroscopy is routinely used during celiac plexus block to ensure correct position of the needle prior to injection. Frames can be imaged and stored or retrieved as a radiograph or as a permanent record. We have found that it is practical and useful to photograph directly from the television monitor to verify needle position. We use the Canon® camera AE-1 model with shutter speed 1/30 s and an automatic aperture. Polaroid® Polargraph 35 mm black-and-white, high-contrast, instant slide film (HC-135) with ASA 400 setting is used with a Polaroid® slide autoproccessing kit.

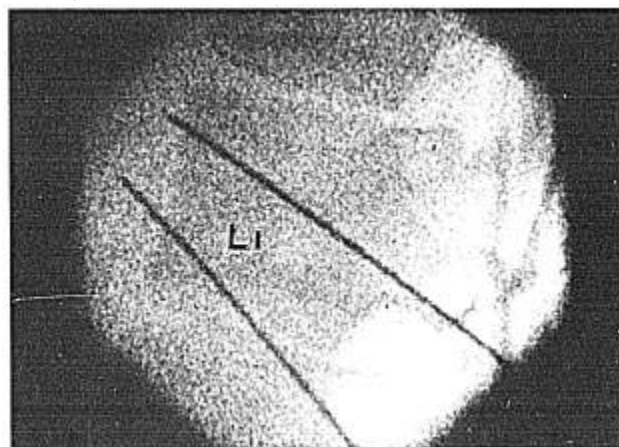

FIG. 1. Lateral view of needle positions in relations to first lumbar vertebra.
